# Supplementary material for: A novel insensitive cocrystal explosive BTO/ATZ: preparation and performance
Source: Royal Society of Chemistry journal article supplement (doi:10.1039/c6ra14510h), 2016-01-01
Supplement: c6ra14510h1.pdf [file c6ra14510h1.pdf]

## A novel insensitive cocrystal explosive BTO/ATZ: preparation and performance

Zhi-Bin Zhang, Tong Li, Lei Yin, Xin Yin, and Jian-Guo Zhang\*

### *Supporting Information*

#### **Figure of contents:**

- S1.** SEM image of BTO.
- S2.** SEM image of ATZ.
- S3.** SEM image of cocrystal.
- S4.** The  $^1\text{H}$  spectra of the cocrystal.
- S5.** The  $^{13}\text{C}$  spectra of the cocrystal.
- S6.** The  $^{15}\text{N}$  spectra of the cocrystal.
- S7.** The FT-IR spectra of BTO.
- S8.** The FT-IR spectra of ATZ.
- S9.** The FT-IR spectra of cocrystal.
- S10.** The C1s spectra for the cocrystal and co-formers.
- S11.** The N1s spectra for the cocrystal and co-formers.
- S12.** The O1s spectra for the cocrystal and co-formers.
- S13.** The measured value and theoretical value of the PXRD for the cocrystal.

---

\* Prof. Dr. J.-G. Zhang  
Fax: +86-10-68918091  
E-Mail: [zjgbit@bit.edu.cn](mailto:zjgbit@bit.edu.cn)

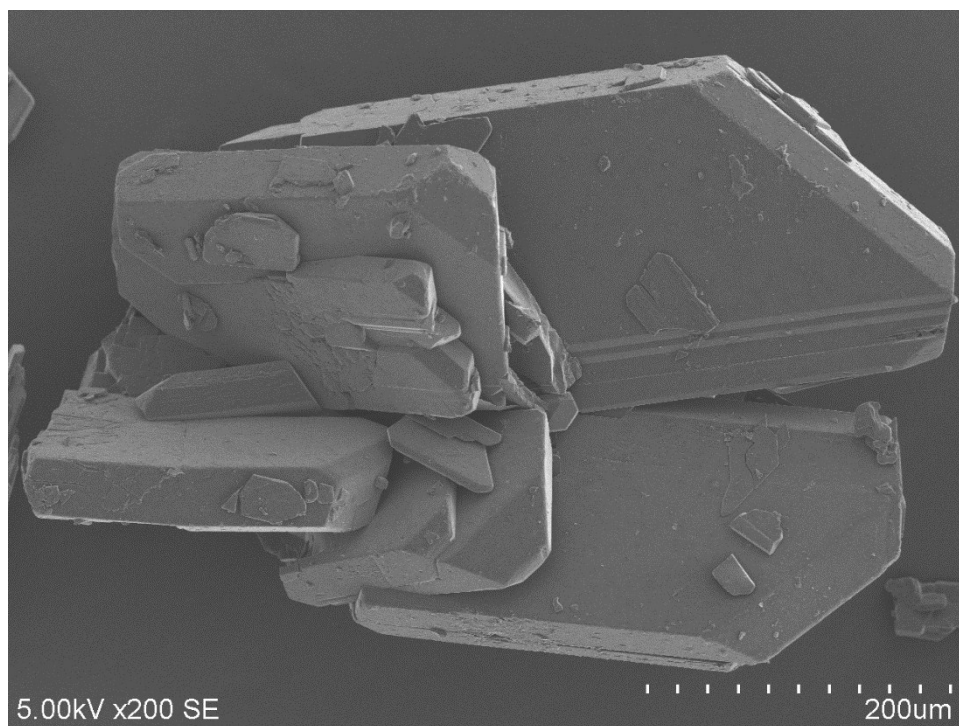

**Fig. S1** SEM image of BTO.

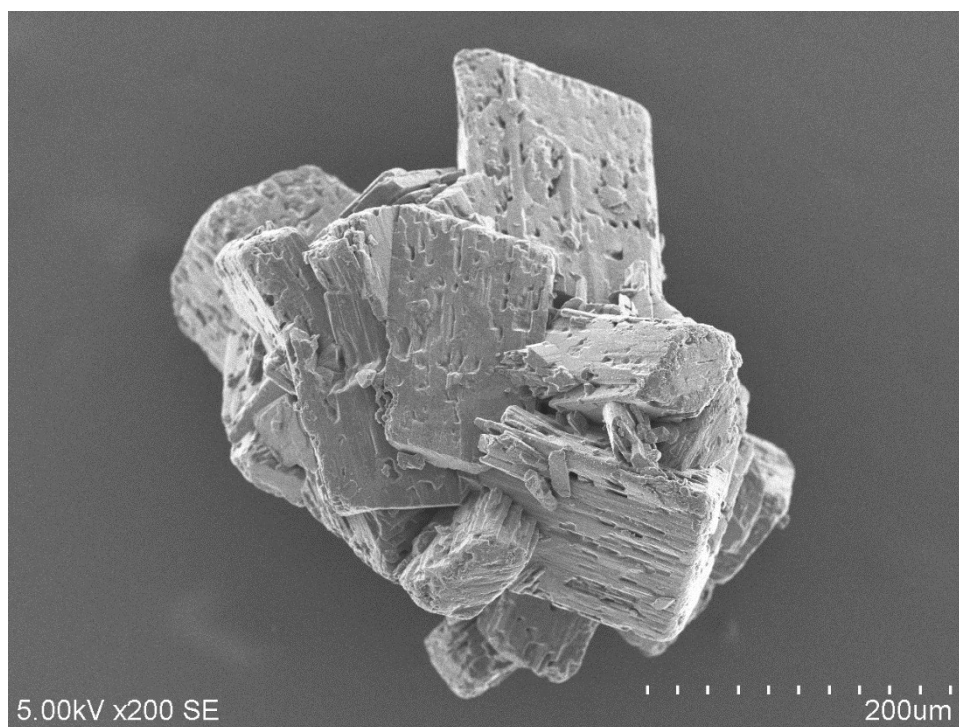

**Fig. S2** SEM image of ATZ.

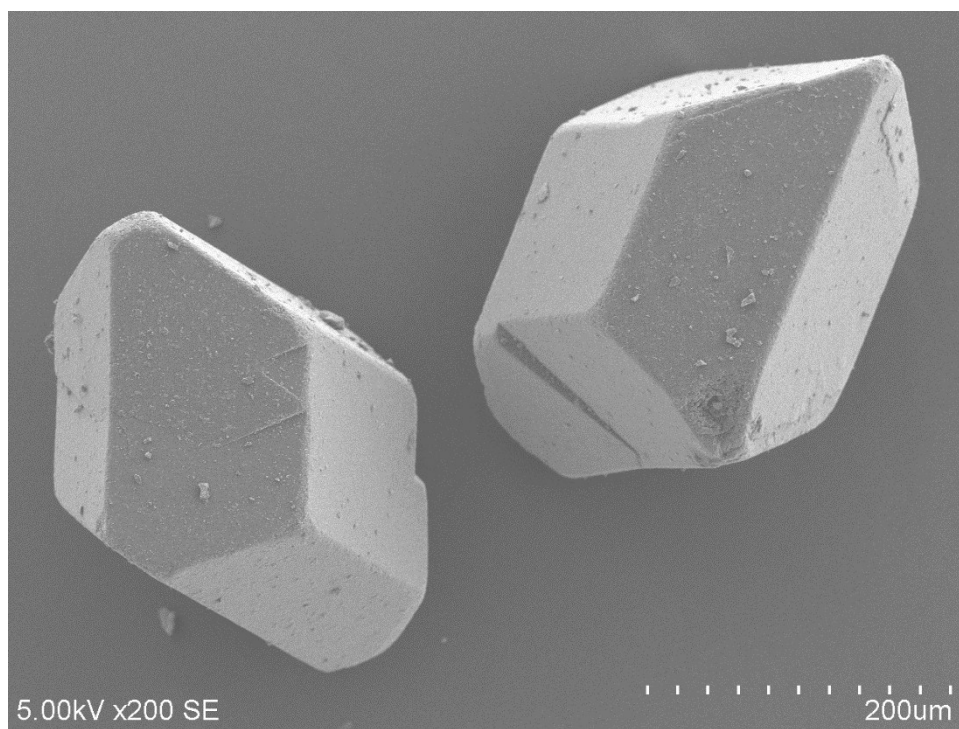

**Fig. S3** SEM image of cocystal.

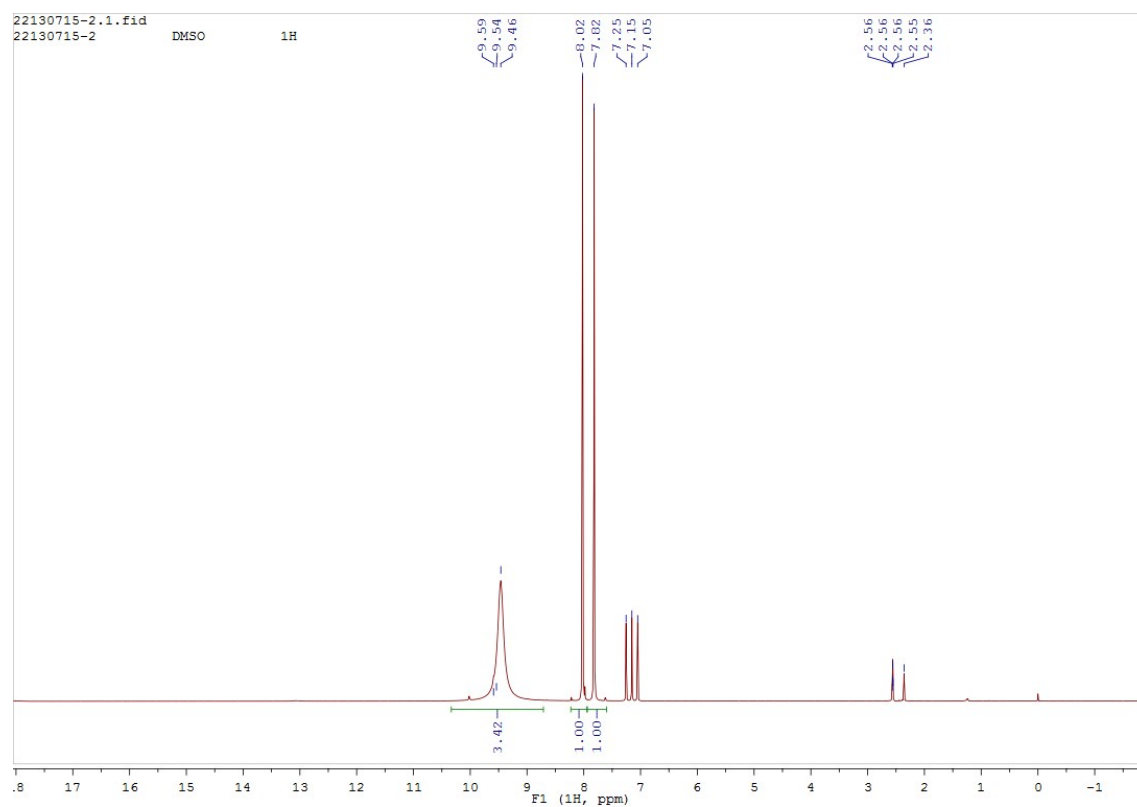

**Fig. S4** The  $^1\text{H}$  spectra of the cocystal.

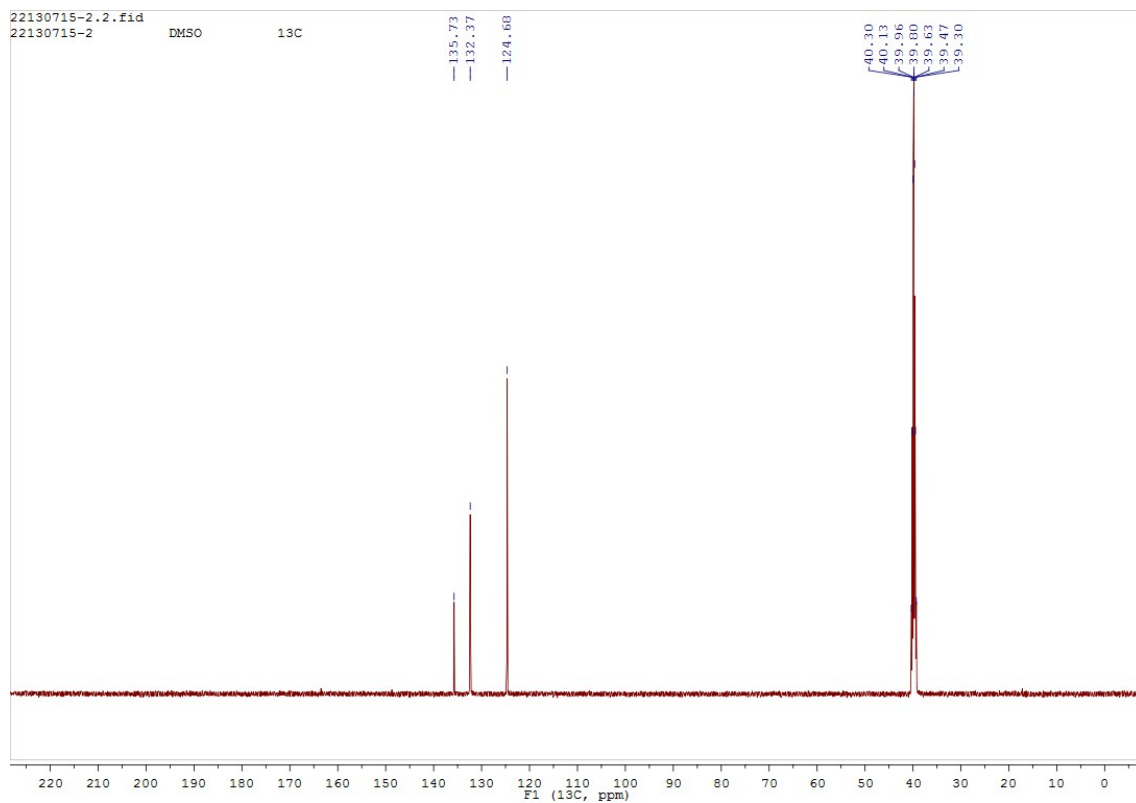

**Fig. S5** The  $^{13}\text{C}$  spectra of the cocrystal.

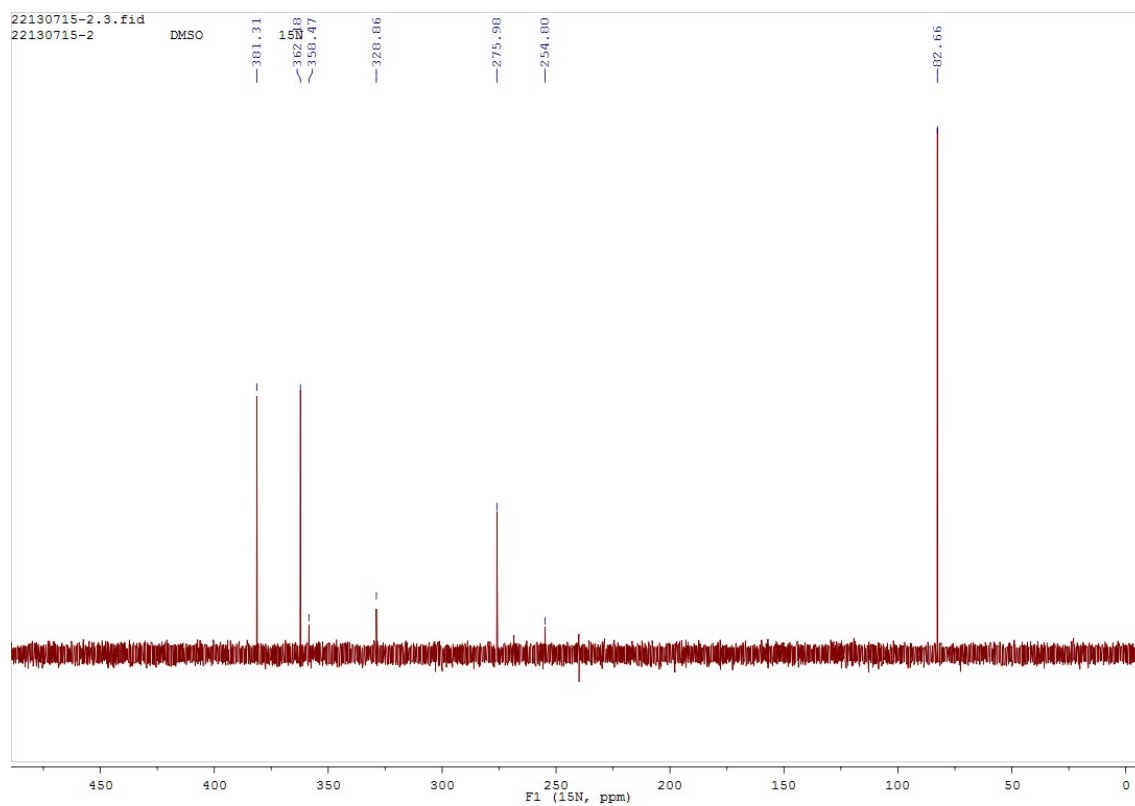

**Fig. S6** The  $^{15}\text{N}$  spectra of the cocrystal.



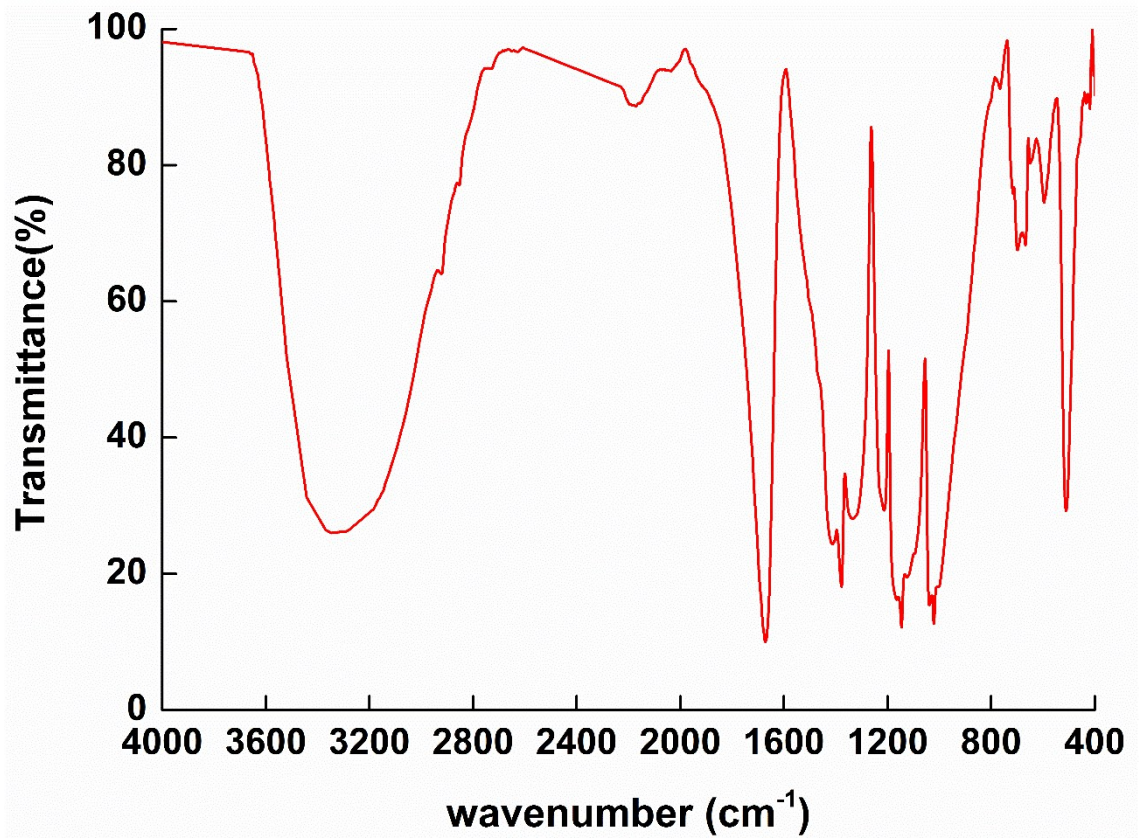

Fig. S7 The FT-IR spectra of BTO.

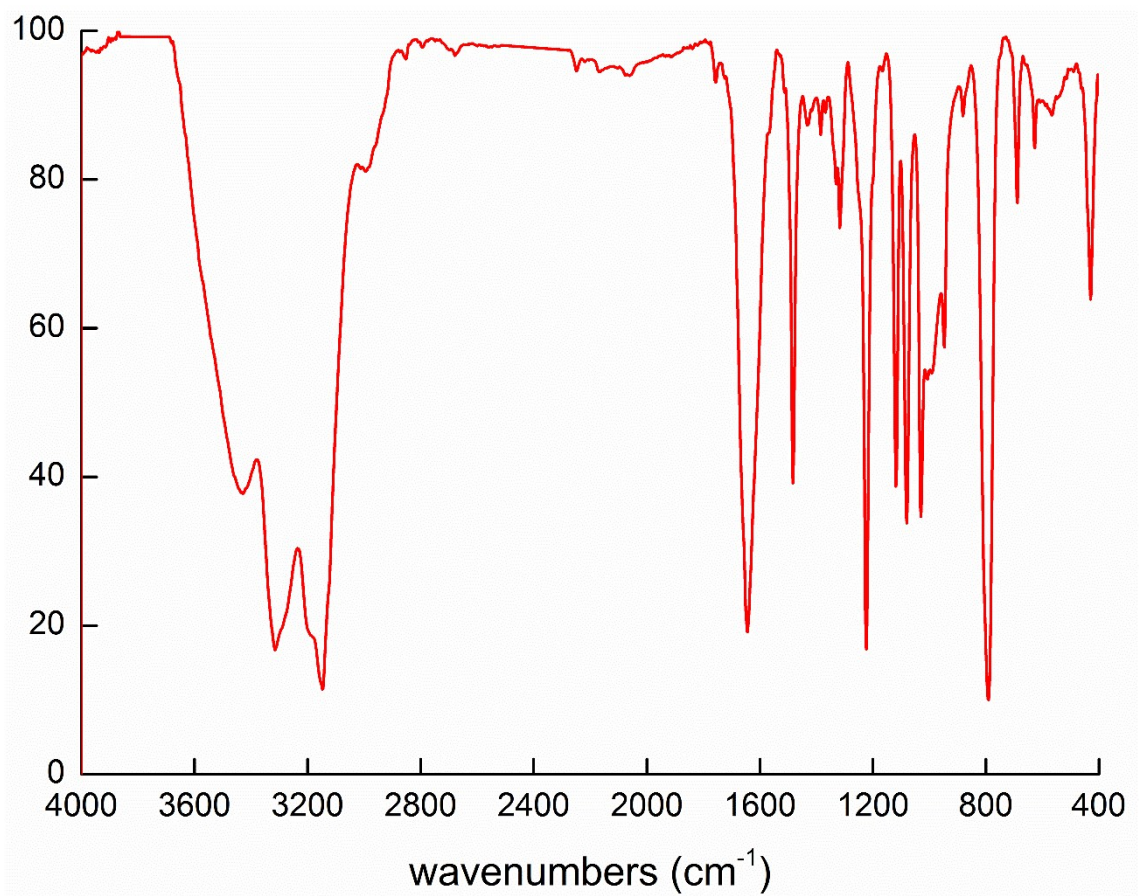

Fig. S8 The FT-IR spectra of AZT

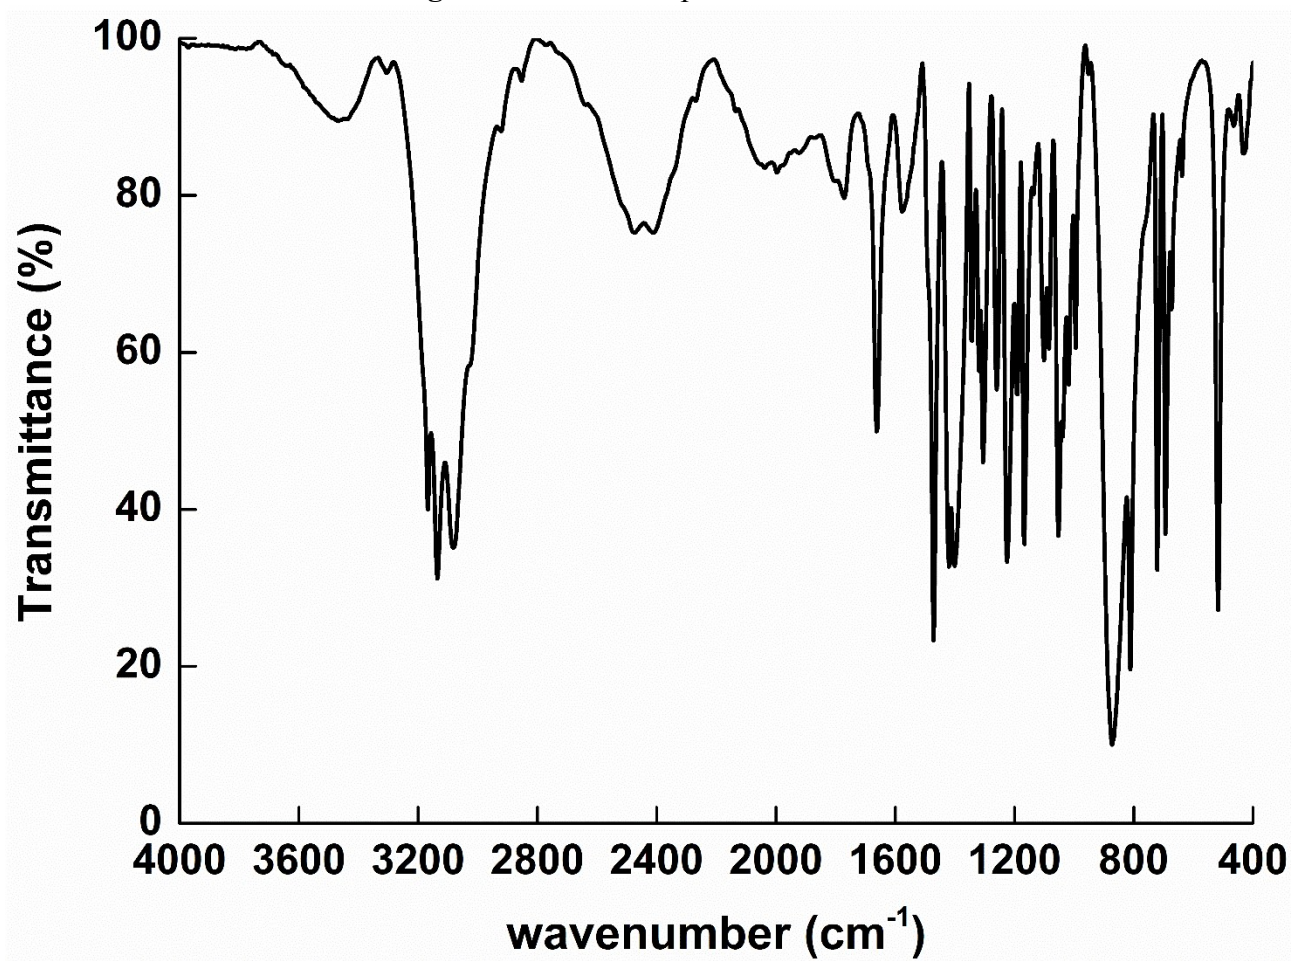

Fig. S9 The FT-IR spectra of cocystal.

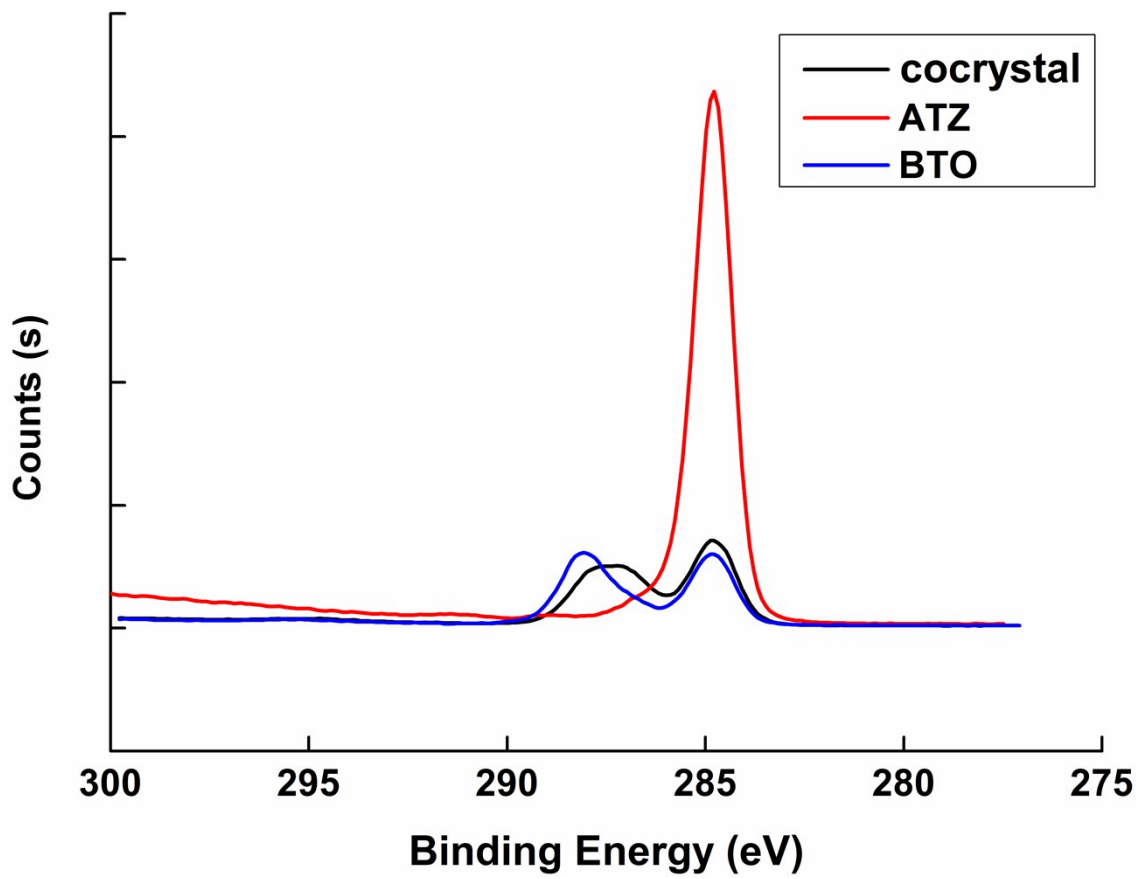

Fig.10 The C1s spectra for the cocrystal and co-formers.

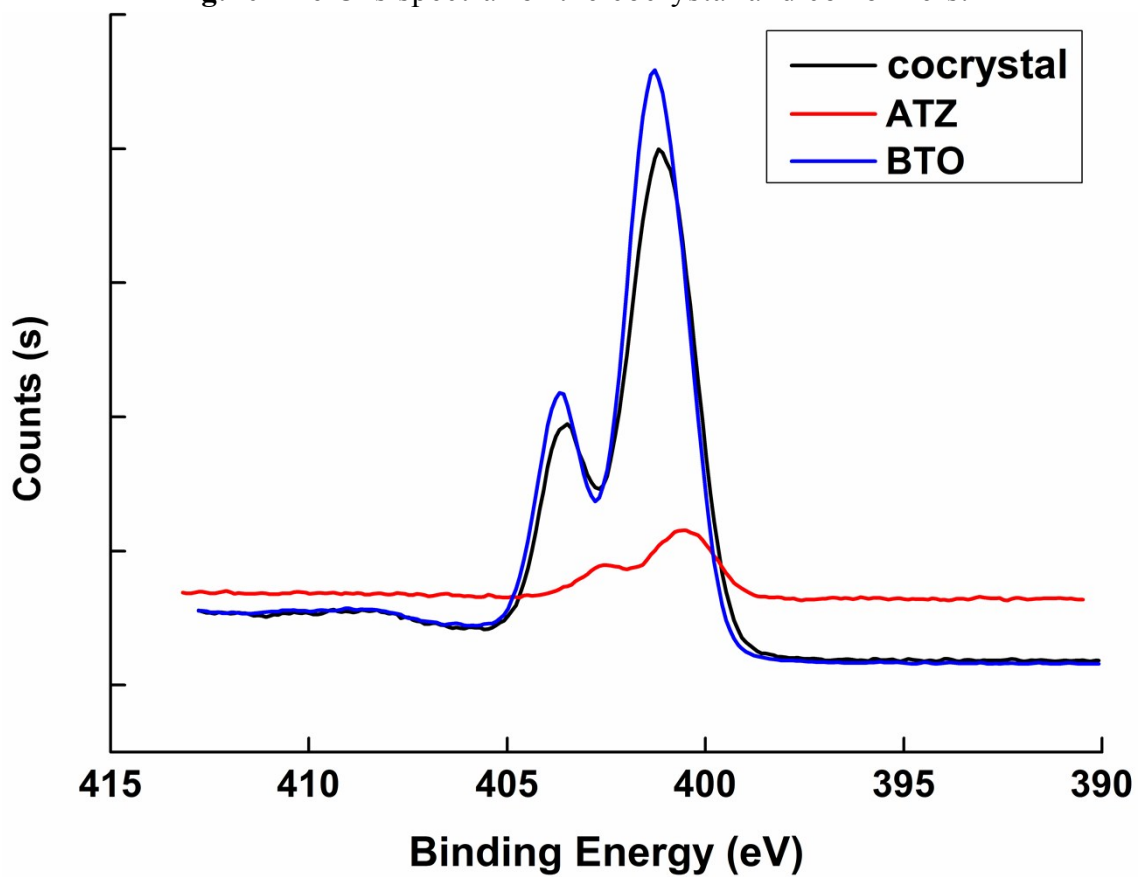

Fig.11 The N1s spectra for the cocrystal and co-formers.



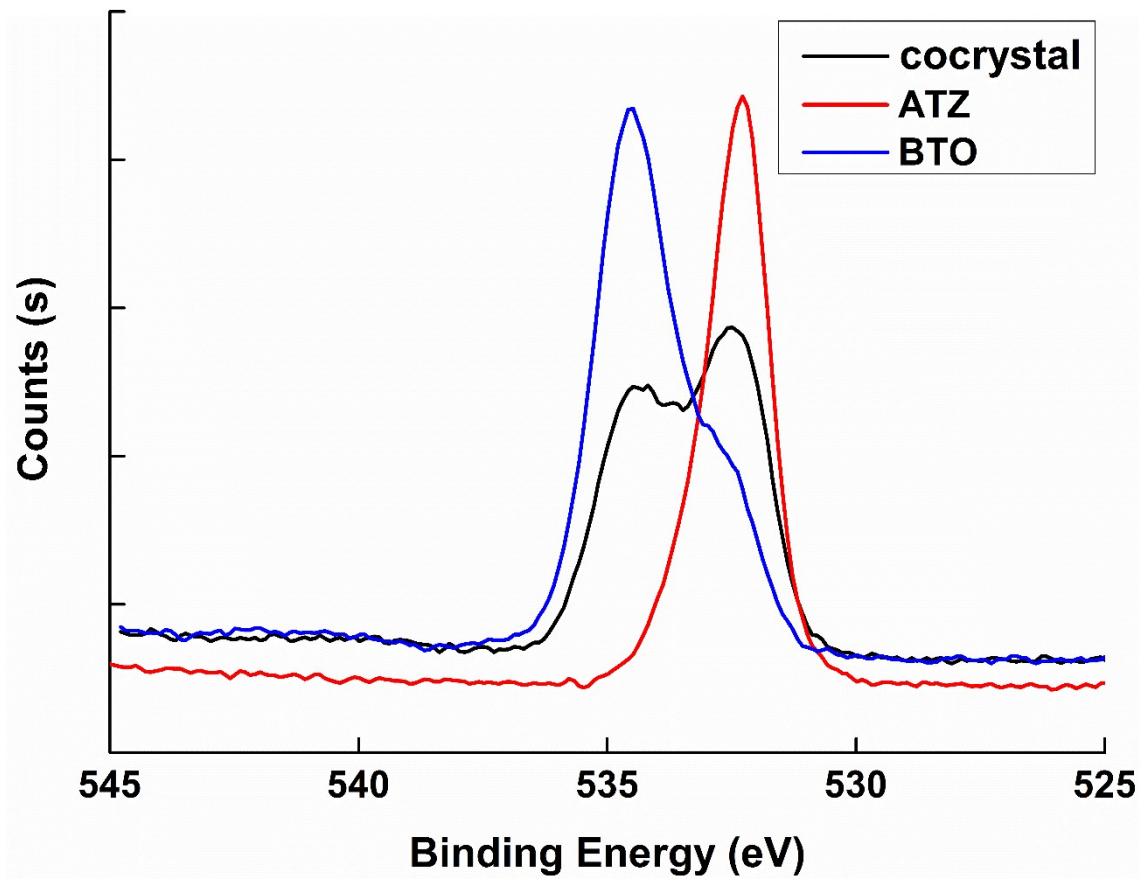

Fig.12 The O1s spectra for the cocrystal and co-formers.



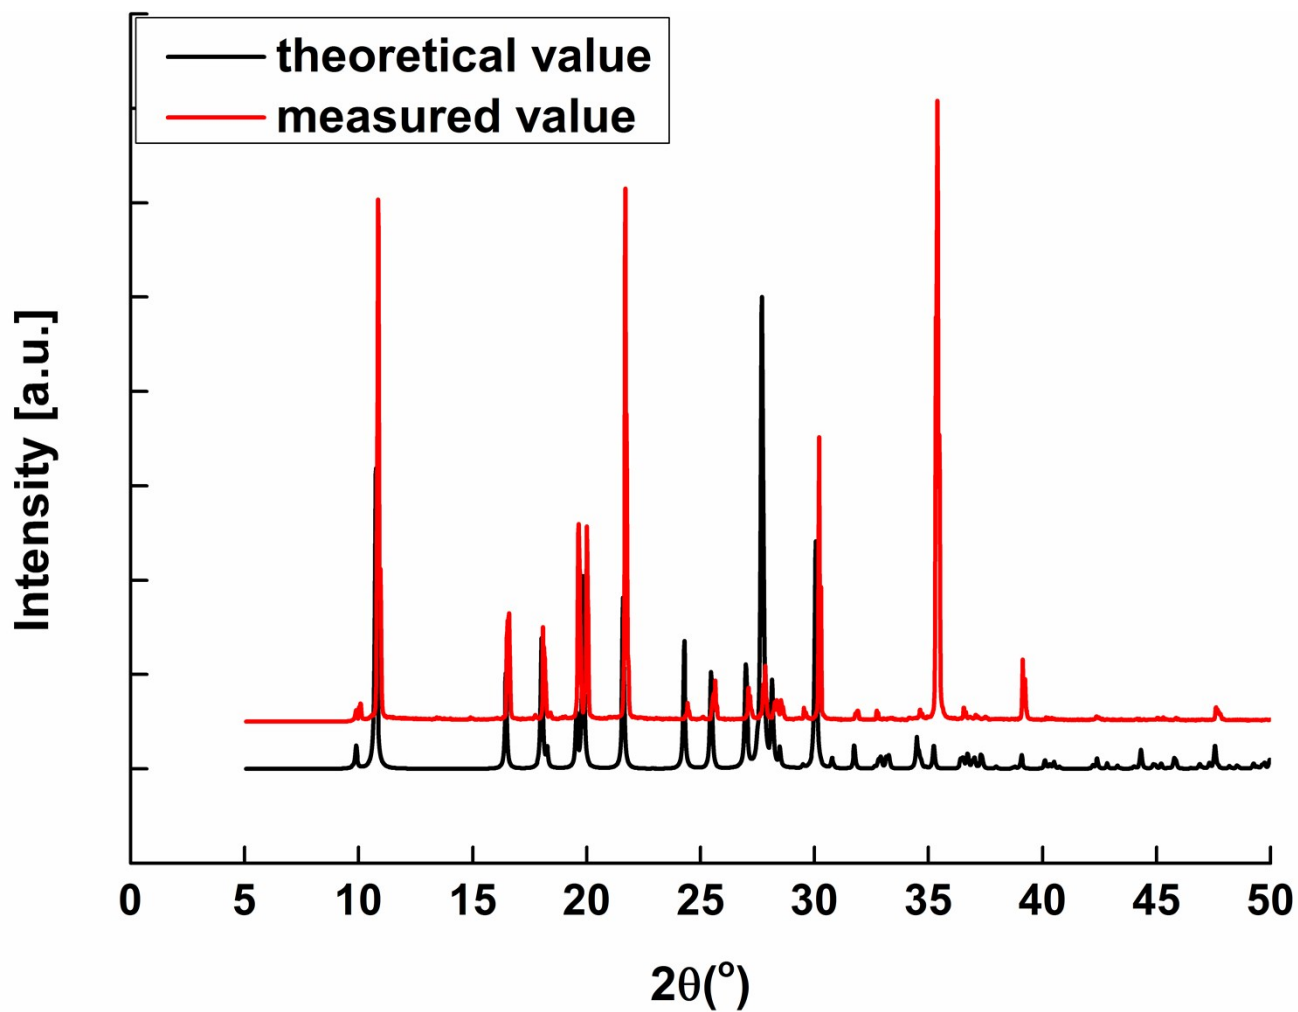

Fig. S13 The measured value and theoretical value of the PXRD for the cocrystal.
